# Supplementary material for: Chemical looping of metal nitride catalysts: low-pressure ammonia synthesis for energy storage
Source: PubMed Central journal article supplement — Chem Sci. 2015 May 1;6(7):3965–74. doi: 10.1039/c5sc00789e (PMC5707470; doi:10.1039/c5sc00789e), 2015-05-01
Supplement: SC-006-C5SC00789E-s001.pdf [file SC-006-C5SC00789E-s001.pdf]

Electronic Supplementary Information for:

## Chemical looping of metal nitride catalysts: Low-pressure ammonia synthesis for energy storage

R. Michalsky,<sup>\*abc</sup> A. M. Avram,<sup>a,‡</sup> B. A. Peterson,<sup>a,#</sup> P. H. Pfromm<sup>a</sup> and A. A. Peterson<sup>b</sup>

<sup>a</sup> Department of Chemical Engineering, 1005 Durland Hall, Kansas State University, Manhattan, Kansas 66506, United States, <sup>b</sup> School of Engineering, 184 Hope Street, Brown University, Providence, Rhode Island 02912, United States. <sup>c</sup> ETH Zürich, Department of Mechanical and Process Engineering, Sonneggstrasse 3, 8092 Zürich, Switzerland

### Corresponding Author

\* E-mail: michalskyr@ethz.ch. Telephone: +41 44-6338383.

## Overview

### 1. Computational details

- 1.1 Local optimization procedures
- 1.2 Reference energies
- 1.3 Free energy corrections
- 1.4 Surface energetics

### 2. Experimental details

- 2.1 Metal nitride characterization
- 2.2 Heating and cooling rates
- 2.3 NH<sub>3</sub> evolution from Fe-doped Mn<sub>4</sub>N
- 2.4 Effect of H<sub>2</sub> gas flow rate on the NH<sub>3</sub> yield from Ca<sub>3</sub>N<sub>2</sub>
- 2.5 Processing of experimental data

### 3. Supporting results

- 3.1 Surface oxidation
- 3.2 Central role of the nitrogen vacancies
- 3.3 Thermochemical reactivity of metal nitrides
- 3.4 NH<sub>3</sub> evolution from Fe-doped Mn<sub>4</sub>N
- 3.5 Ammonia via metal nitride hydrogenation

### 4. References

## 1. Computational details

### 1.1 Local optimization procedures

The adsorption energies of  $H^*$  and  $OH^*$  at the stoichiometric  $Mn_2N(0001)$  and  $Sr_2N(001)$  surfaces were computed by placing an adsorbate at a unique, non-symmetric, initial adsorption position, *i.e.*, on-top a metal atom, at bridge sites between two metal atoms, at three-fold metal sites with a lower vacant interstitial (TFM) or lower lattice nitrogen, and minimizing the total electronic energy of the system to extract the optimized adsorption geometry. For both metal nitride surfaces the TFM site was determined as the preferred adsorption site for  $H^*$  and  $OH^*$  adsorbates. Thus, the adsorption of various  $ML NH_x^*$  ( $x = 0, 1, 2$  or  $3$ ),  $H^*$  and  $OH^*$  was computed with the nitrogen species adsorbed above the source of the nitrogen, *i.e.*, above a nitrogen vacancy, and  $H^*$  and  $OH^*$  adsorbed at the TFM sites at maximum distance to the surrounding co-adsorbates.

### 1.2 Reference energies

The reported adsorption and reaction energies are relative to stable gas phase molecules, *i.e.*, the energy of the adsorbate  $A$  in the gas phase,  $E_A^r$ , is either the total electronic energy,  $E$ , of a stable gas phase molecule, *i.e.*,  $NH_3$ ,  $H_2O$  and  $H_2$ , or derived from the energy of these molecules:

$$(S1) \quad E_H^r \equiv E[H_2]/2$$

$$(S2) \quad E_N^r \equiv E_{NL}^r = E[NH_3] - 3/2 \times E[H_2]$$

$$(S3) \quad E_{NH}^r \equiv E[NH_3] - E[H_2]$$

$$(S4) \quad E_{NH_2}^r \equiv E[NH_3] - E[H_2]/2$$

$$(S5) \quad E_O^r \equiv E[H_2O] - E[H_2]$$

$$(S6) \quad E_{OH}^r \equiv E[H_2O] - E[H_2]/2$$

where  $E_N^r$  and  $E_{NL}^r$  are the identical reference energy for atomic nitrogen either adsorbed at the surface or as part of the crystal lattice.

### 1.3 Free energy corrections

Gibbs free energies at  $T = 298.15$  K and 1.013 bar total pressure,  $G_i$ , are calculated as below:

$$(S7) \quad G_i = H_i - TS_i = E_i + U_{ZPE,i} - TS_i$$

where  $H_i$  and  $S_i$  are the enthalpy and entropy of an atomic geometry  $i$  respectively,  $E_i$  is the DFT-calculated electronic energy and  $U_{ZPE,i}$  is the zero-point vibrational energy ( $S_i$  and  $U_{ZPE,i}$  are taken into account for molecular species while they are neglected for the surface models; the free energy of nitrogen adsorbates and nitrogen vacancies are treated equally, see Eq. S2). All thermodynamic properties were calculated with vibrational frequencies and standard statistical mechanical equations evaluated through the Atomic Simulation Environment.<sup>1</sup>

### 1.4 Surface energetics

To characterize the surface reactivity, four additional quantities are provided with Table S2:

$\Delta G_{\text{vac}}[\text{N}^*, \text{OH}^*, \text{H}^*]$ , *i.e.*, the net-energy that is required to form  $\frac{1}{4}$  ML<sub>VN</sub> and  $\frac{1}{4}$  ML N<sup>\*</sup>, and  $\frac{1}{4}$  ML OH<sup>\*</sup> and  $\frac{1}{4}$  ML H<sup>\*</sup> from H<sub>2</sub>O in the gas phase:

$$(S8) \quad \Delta G_{\text{vac}}[\text{N}^*, \text{OH}^*, \text{H}^*] \equiv G_{\text{s}}[\text{N}^*, \text{OH}^*, \text{H}^*] - (G_{\text{s}} + G_{\text{H}_2\text{O}}^{\text{r}})$$

where  $G_{\text{s}}[\text{N}^*, \text{OH}^*, \text{H}^*]$ ,  $G_{\text{s}}$  and  $G_{\text{H}_2\text{O}}^{\text{r}}$  are the total electronic energies of the surface with  $\frac{1}{4}$  ML<sub>VN</sub>,  $\frac{1}{4}$  ML N<sup>\*</sup>,  $\frac{1}{4}$  ML OH<sup>\*</sup> and  $\frac{1}{4}$  ML H<sup>\*</sup>, the stoichiometric surface and of H<sub>2</sub>O in the gas phase.

$\Delta G_{\text{hyd}}[\text{NH}^*, \text{OH}^*]$ , *i.e.*, the energy required to hydrogenate  $\frac{1}{4}$  ML N<sup>\*</sup> in the presence of  $\frac{1}{4}$  ML OH<sup>\*</sup> with  $\frac{1}{4}$  ML co-adsorbed H<sup>\*</sup>:

$$(S9) \quad \Delta G_{\text{hyd}}[\text{NH}^*, \text{OH}^*] \equiv G_{\text{s}}[\text{NH}^*, \text{OH}^*] - G_{\text{s}}[\text{N}^*, \text{OH}^*, \text{H}^*]$$

where  $G_{\text{s}}[\text{NH}^*, \text{OH}^*]$  is the energy of the surface with  $\frac{1}{4}$  ML<sub>VN</sub>,  $\frac{1}{4}$  ML NH<sup>\*</sup> and  $\frac{1}{4}$  ML OH<sup>\*</sup> and  $G_{\text{hyd}}[\text{N}^*, \text{OH}^*, \text{H}^*]$  is the energy of the surface with  $\frac{1}{4}$  ML<sub>VN</sub>,  $\frac{1}{4}$  ML N<sup>\*</sup>,  $\frac{1}{4}$  ML OH<sup>\*</sup> and  $\frac{1}{4}$  ML H<sup>\*</sup>.

$\Delta G_{\text{oxi}}[\text{N}^*, 2\text{H}^*]$ , *i.e.*, the net-energy required to form  $\frac{1}{4}$  ML<sub>VN</sub> that is filled with lattice oxygen, O<sub>L</sub>, derived from the cleavage of H<sub>2</sub>O yielding a partly oxidized surface covered with  $\frac{1}{4}$  ML N<sup>\*</sup> and  $\frac{1}{2}$  ML H<sup>\*</sup>:

$$(S10) \quad \Delta G_{\text{oxi}}[\text{N}^*, 2\text{H}^*] \equiv G_{\text{s}}[\text{O}_L, \text{N}^*, 2\text{H}^*] - (G_{\text{s}} + G_{\text{H}_2\text{O}}^{\text{r}})$$

where  $G_{\text{s}}[\text{O}_L, \text{N}^*, 2\text{H}^*]$  is the energy of the surface with  $\frac{1}{4}$  ML<sub>VN</sub> that is filled with O<sub>L</sub> and covered with  $\frac{1}{4}$  ML N<sup>\*</sup> and  $\frac{1}{2}$  ML H<sup>\*</sup>.

$\Delta G_{\text{oxi,hyd}}[\text{NH}^*, \text{H}^*]$ , *i.e.*, the energy required to hydrogenate  $\frac{1}{4}$  ML N<sup>\*</sup> on an oxynitride surface with  $\frac{1}{4}$  ML O<sub>L</sub> with  $\frac{1}{2}$  ML co-adsorbed H<sup>\*</sup>:

$$(S11) \quad \Delta G_{\text{oxi,hyd}}[\text{NH}^*, \text{H}^*] \equiv G_{\text{s}}[\text{O}_L, \text{NH}^*, \text{H}^*] - G_{\text{s}}[\text{O}_L, \text{N}^*, 2\text{H}^*]$$

where  $G_{\text{s}}[\text{O}_L, \text{NH}^*, \text{H}^*]$  is the energy of the surface with  $\frac{1}{4}$  ML<sub>VN</sub> that is filled with O<sub>L</sub> and covered with  $\frac{1}{4}$  ML NH<sup>\*</sup> and  $\frac{1}{4}$  ML H<sup>\*</sup>.

## 2. Experimental details

### 2.1 Metal nitride characterization

Table S1: Characterization of binary metal nitrides

| phase <sup>A</sup>                                               | $\epsilon$ -Mn <sub>4</sub> N<br>( $\zeta$ -Mn <sub>6</sub> N <sub>2.58</sub> ) | $\alpha$ -Ca <sub>3</sub> N <sub>2</sub><br>(Ca <sub>2</sub> N) | Sr <sub>2</sub> N |
|------------------------------------------------------------------|---------------------------------------------------------------------------------|-----------------------------------------------------------------|-------------------|
| space group <sup>A</sup>                                         | Pm $\bar{3}$ m<br>(P6 <sub>3</sub> 22)                                          | Ia $\bar{3}$<br>(R $\bar{3}$ m)                                 | R $\bar{3}$ m     |
| $d_p$ ( $\mu\text{m}$ ) <sup>B</sup>                             | 46 $\pm$ 19                                                                     | 105 $\pm$ 25                                                    | 125 $\pm$ 46      |
| $A_{\text{BET}}$ (m <sup>2</sup> kg <sup>-1</sup> ) <sup>C</sup> | 270 $\pm$ 3                                                                     | 1253 $\pm$ 6                                                    | 1048 $\pm$ 4      |
| $\Phi$ (vol.%) <sup>D</sup>                                      | 62 $\pm$ 1                                                                      | 55 $\pm$ 3                                                      | 53 $\pm$ 1        |

(<sup>A</sup> Minor phases given in parentheses; <sup>B</sup> average particle diameter; <sup>C</sup> BET surface area; <sup>D</sup> void space fraction,  $\Phi = 1 - \rho_{\text{bulk}}/\rho_{\text{particle}}$ , where density  $\rho_i$  is in kg m<sup>-3</sup>; powder bed surface  $\sim 33 \pm 2$  cm<sup>2</sup>, bed thickness  $< 1$  mm.)

## 2.2 Heating and cooling rates

The heating rates,  $r_H$  (in  $^{\circ}\text{C min}^{-1}$ ), of the metal nitrides in  $\text{H}_2$  are variable, dependent on the final reaction temperature,  $T$  (in  $^{\circ}\text{C}$ ), and the heating time,  $t$  (in min).

For the reduction of  $\text{Mn}_4\text{N}$  and  $\text{Mn}_6\text{N}_{2.58}$  with  $\text{H}_2$ ,  $r_H = A(T) \times t + B(T)$ , where  $A(T)$  is in the range of 22.1 to 41.5  $^{\circ}\text{C min}^{-2}$  ( $T = 300$  or  $550$   $^{\circ}\text{C}$ ) and 5.09 to 13.7  $^{\circ}\text{C min}^{-2}$  ( $T = 700$  or  $1000$   $^{\circ}\text{C}$ ) respectively and  $B(T)$  is in the range of 108 to 126  $^{\circ}\text{C min}^{-1}$  ( $T = 300$  or  $550$   $^{\circ}\text{C}$ ) and 76.2 to 111  $^{\circ}\text{C min}^{-1}$  ( $T = 700$  or  $1000$   $^{\circ}\text{C}$ ) respectively. The Fe/ $\text{Mn}_4\text{N}$  reactant was heated in  $\text{H}_2$  from 100 to 700 $^{\circ}\text{C}$  at about  $40 \pm 11$   $^{\circ}\text{C min}^{-1}$  and in  $\text{H}_2$  from 100 to 750 $^{\circ}\text{C}$  at about  $42 \pm 4$   $^{\circ}\text{C min}^{-1}$ .

The heating rate during cycling  $\text{Mn}_6\text{N}_{2.58}$ ,  $\text{Ca}_3\text{N}_2$  and  $\text{Sr}_2\text{N}$  with  $\text{H}_2$  between 250 and 850  $^{\circ}\text{C}$  was approximately  $r_H = A \times t + B$ , with  $A = -5.21$   $^{\circ}\text{C min}^{-2}$  and  $B = 85.4$   $^{\circ}\text{C min}^{-1}$ .

Cooling from the reaction temperature to below 100 $^{\circ}\text{C}$  was rapidly at  $-520$  to  $-49.5$   $^{\circ}\text{C min}^{-1}$  within the first min,  $-88.3$  to  $-8.81$   $^{\circ}\text{C min}^{-1}$  at below 10 min, and  $-15.5$  to  $-1.17$   $^{\circ}\text{C min}^{-1}$  at above 10 min.

## 2.3 $\text{NH}_3$ evolution from Fe-doped $\text{Mn}_4\text{N}$

To assess the effect of doping with Fe on the  $\text{NH}_3$  evolution from  $\text{Mn}_4\text{N}$ , 1.69 g of an Fe/ $\text{Mn}_4\text{N}$  mixture with about 3.8 mmol lattice nitrogen was heated consecutively in  $\text{H}_2$  ( $\text{NH}_3$  evolution) and  $\text{N}_2$  ( $\text{N}_2$  reduction). The reactant was heated in  $0.5 \pm 0.1$   $\text{L}_{(\text{STP})} \text{H}_2 \text{ min}^{-1}$  from 100 to 700 $^{\circ}\text{C}$ , held for 10 min. STP marks volumes at standard pressure and temperature, *i.e.*, 1 bar and 0 $^{\circ}\text{C}$ . Liquid samples of 5 mL were taken at 0, 5 and 10 min after the reaction temperature was reached and after cooling the furnace. After XRD analysis, the solid was reintroduced into the furnace, heated from 100 to 750  $^{\circ}\text{C}$  in  $0.5 \pm 0.1$   $\text{L}_{(\text{STP})} \text{H}_2 \text{ min}^{-1}$ , heated at  $750 \pm 5$   $^{\circ}\text{C}$  for 10 min in  $1.9 \pm 0.1$   $\text{L}_{(\text{STP})} \text{N}_2 \text{ min}^{-1}$ , cooled, and analyzed via XRD. The experiment was repeated in triplicate.

## 2.4 Effect of $\text{H}_2$ gas flow rate on the $\text{NH}_3$ yield from $\text{Ca}_3\text{N}_2$

The effect of the  $\text{H}_2$  gas flow rate on the yield of  $\text{NH}_3$  was analyzed by heating  $491 \pm 42$  mg  $\text{Ca}_3\text{N}_2$  ( $6.6 \pm 0.5$  mmol lattice nitrogen) for 120 min at 700 $^{\circ}\text{C}$  ( $40 \pm 2$   $^{\circ}\text{C min}^{-1}$  average heating rate) in 0.19, 0.47, 0.93 and  $1.86 \pm 0.09$   $\text{L}_{(\text{STP})} \text{H}_2 \text{ min}^{-1}$ . At 0, 1, 5, 10, 30, 60 and 120 min after reaching  $700 \pm 5$   $^{\circ}\text{C}$ , 5 mL samples were taken from the liquid absorbent for  $\text{NH}_3$  analysis.

## 2.5 Processing of experimental data

The  $\text{NH}_3$  yield,  $Y_{\text{NH}_3}$ , is reported as the molar ratio of  $\text{NH}_3$  captured by the acidic absorbent ( $n$  in mol) at a given time,  $t$ , relative to the total lattice nitrogen of the reactant before the reaction with  $\text{H}_2$ :

$$(S12) Y_{\text{NH}_3} = \frac{n_{\text{absorbedNH}_3,t}}{n_N} = V_t \sum_{t=0-60\text{min}} (c_{\text{NH}_3,t} - c_{\text{NH}_3}^{\#}) \left( m_r \sum_{i=\text{all nitrides}} b_i x_i M_i^{-1} \right)^{-1}$$

where  $c_{\text{NH}_3}$  in  $\text{mol L}^{-1}$  is the concentration of  $\text{NH}_3$  detected in the absorbent, the hash symbol marks pure water used as a reference,  $V$  in L is the liquid sample volume,  $m_r$  in g is the mass of metal nitride powder reacted,  $b$  is the molar ratio of lattice nitrogen per nitride,  $x$  in  $\text{g g}^{-1}$  is the nitride weight fraction, and  $M$  in  $\text{g mol}^{-1}$  is the molar mass.

The reaction kinetics are represented best with a shrinking-core model for nitride particles with constant size limited by the chemical reaction<sup>2</sup>:

$$(S13) k_r t = 1 - (1 - X_{NH_3})^{1/3}$$

or by the diffusion of reaction participants through the gas film covering the particles<sup>2</sup>:

$$(S14) k_g t = X_{NH_3}$$

where  $k_r$  and  $k_g$  are specific rate constants.

### 3. Supporting results

#### 3.1 Surface oxidation

Table S2: Theoretical surface reactivity

| energy (eV)                                                  | reaction <sup>A</sup>                                                                                                             | Mn <sub>2</sub> N(0001) | Sr <sub>2</sub> N(0001) |
|--------------------------------------------------------------|-----------------------------------------------------------------------------------------------------------------------------------|-------------------------|-------------------------|
| $\Delta G_{\text{vac}}[\text{N}^*, \text{OH}^*, \text{H}^*]$ | $3^* + \text{N}_{\text{lat}}^s + \text{H}_2\text{O}_{(\text{g})} = \text{v}_{\text{N}}^s + \text{N}^* + \text{OH}^* + \text{H}^*$ | -1.42                   | -2.71                   |
| $\Delta G_{\text{hyd}}[\text{NH}^*, \text{OH}^*]$            | $\text{v}_{\text{N}}^s + \text{N}^* + \text{OH}^* + \text{H}^* = \text{v}_{\text{N}}^s + \text{NH}^* + \text{OH}^* + ^*$          | 0.19                    | 0.54                    |
| $\Delta G_{\text{oxi}}[\text{N}^*, 2\text{H}^*]$             | $\text{N}_{\text{lat}}^s + 3^* + \text{H}_2\text{O}_{(\text{g})} = \text{O}_{\text{lat}}^s + \text{N}^* + 2\text{H}^*$            | -0.43                   | -0.53                   |
| $\Delta G_{\text{oxi,hyd}}[\text{NH}^*, \text{H}^*]$         | $\text{v}_{\text{N}}^s + \text{N}^* + \text{OH}^* + \text{H}^* = \text{O}_{\text{lat}}^s + \text{NH}^* + \text{H}^* + ^*$         | 1.13                    | 0.08                    |

<sup>A</sup>) lat and s mark the lattice nitrogen and surface; gaseous reference molecules are marked with (g); vacant surface sites and chemical species adsorbed at the surface are marked with an asterisk.

#### 3.2 Central role of the nitrogen vacancies

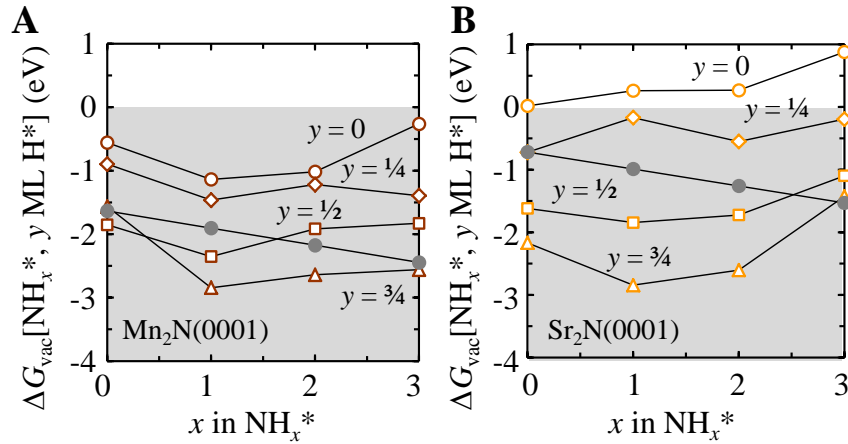

**Figure S1:** Free energies of forming  $1/4$  ML  $\text{v}_{\text{N}}$  yielding  $1/4$  ML  $\text{NH}_x^*$  in the presence of  $y = 0$  (circles),  $1/4$  (diamonds),  $1/2$  (squares), and  $3/4$  (triangles) ML  $\text{H}^*$  on (A) Mn<sub>2</sub>N(0001) and (B) Sr<sub>2</sub>N(0001). Alternatively to the data presented in the manuscript that is assuming pre-adsorbed  $\text{H}^*$ , to compare trends, all energies are computed here assuming gas phase  $\text{H}_2$  as the source of  $\text{H}^*$  and the hydrogen contained in  $\text{NH}_x^*$ . The total adsorption energy of  $x/4$  ML  $\text{H}^*$  (via dissociative adsorption of  $\text{H}_2$  from the gas phase) and  $1/4$  ML  $\text{N}^*$  via formation of  $1/4$  ML  $\text{v}_{\text{N}}$  is given for reference (gray filled circles). Lines are a guide only. The shaded regions mark exergonic surface reactions. The analysis indicates that in presence of  $\text{H}_2$  both surfaces are expectedly covered with  $\text{H}^*$  such that  $\text{NH}_x^*$  formation at the surface may be via consumption of surface  $\text{H}^*$ . If a relative high surface coverage of  $1/2$ - $3/4$  ML  $\text{H}^*$  is to be maintained hydrogen from the gas phase may directly utilized to hydrogenate the surface nitrogen adsorbate. This is indicated by the data points that show stronger binding of the  $\text{NH}_x^*$  fragments relative to the reference shown in gray.

The free energies of the surface reactions shown with Figure 3 and Figure S1 scale mostly with the number of surface  $H^*$  adatoms and the number of hydrogen contained in the adsorbed  $NH_x^*$  species. Departures from these correlations lead partly to “crossover” of the shown trends and are due to geometric rearrangement of the adsorbates (switching of the adsorption sites) and the source of the hydrogen consumed by the reaction (surface  $H^*$  vs. gas phase  $H_2$  if the  $H^*$  adatoms do not supply the entire hydrogen required for the reaction, *i.e.*, when forming  $\frac{1}{4}$  ML  $NH_2^*$  in presence of  $\frac{3}{4}$  ML  $H^*$  or when forming  $\frac{1}{4}$  ML  $NH_3^*$  in presence of  $\frac{1}{2}$ - $\frac{3}{4}$  ML  $H^*$ ). The following discusses this in more detail.

As a trend, the endergonic character of forming  $NH_x$  from lattice nitrogen of  $Mn_2N(0001)$  and surface  $H^*$  becomes stronger with increasing  $H^*$  surface coverage. The deviation from this trend when forming  $NH_2^*$  or  $NH_3^*$  in presence of  $\frac{3}{4}$  ML  $H^*$  vs.  $\frac{1}{2}$  ML  $H^*$  is due to a different rearrangement of the  $H^*$  adsorbates. While  $H^*$  is adsorbed at three-fold sites atop Mn in the second surface layer (TFLM), when forming  $N^*$  or  $NH^*$  in presence of  $\frac{1}{2}$  ML  $H^*$  or  $\frac{3}{4}$  ML  $H^*$  (*i.e.*, in addition to the  $\frac{1}{4}$  ML  $NH_x^*$ ),  $\frac{1}{2}$  ML  $H^*$  rearranges in both cases favoring three-fold sites atop N atoms (TFLN) or atop vacancies (TFLV) in the second surface layer, respectively. That is, the rearrangement appears independent on the number of  $H^*$  adatoms and the free energy trend of the surface reactions is preserved. However, when forming  $NH_2^*$  the  $NH_2^*$  moves to a Mn-Mn bridge site (independent on the  $H^*$  surface coverage) while only at  $\frac{3}{4}$  ML  $H^*$  surface coverage  $\frac{1}{4}$  ML  $H^*$  changes the preferred adsorption site from TFLM to TFLV. On the other hand, when forming  $NH_3^*$  ammonia desorbs from the surface (independent on the  $H^*$  surface coverage) while the adsorption sites of the  $H^*$  adatoms at  $Mn_2N(0001)$  in presence of  $\frac{1}{4}$  ML  $v_N$  is preserved, relative to the adsorption sites of  $\frac{1}{2}$  ML  $H^*$  or  $\frac{3}{4}$  ML  $H^*$  at the stoichiometric  $Mn_2N(0001)$ . This indicates that the departures from free energy trends when forming  $\frac{1}{4}$  ML  $NH_2^*$  or  $\frac{1}{4}$  ML  $NH_3^*$  in presence of  $\frac{3}{4}$  ML  $H^*$  vs.  $\frac{1}{2}$  ML  $H^*$  can only partly be rationalized with adsorbate rearrangement. The fact that the formation of  $\frac{1}{4}$  ML  $NH_3^*$  in presence of  $\frac{1}{2}$  ML  $H^*$  deviates as well from the trend, relative to the formation of  $\frac{1}{4}$  ML  $NH_3^*$  in presence of  $\frac{1}{4}$  ML  $H^*$  supports the conclusion that these “crossovers” are rather due to a change in the hydrogen reference energy. In all three cases  $\frac{1}{4}$ - $\frac{1}{2}$  ML hydrogen are from additional  $H_2$  gas since the surface  $H^*$  does not supply sufficient hydrogen for the surface reactions. Still, the “crossover” of forming  $\frac{1}{4}$  ML  $NH^*$  in presence of  $\frac{1}{4}$  ML  $H^*$  vs. 0 ML  $H^*$  at  $Sr_2N(0001)$  cannot be explained with gas phase  $H_2$  as source of the hydrogen that is consumed by the reaction but correlates with different surface  $H^*$  ( $H^*$  adsorbed at different sites) consumed by forming the  $NH^*$  species.

### 3.3 Thermochemical reactivity of metal nitrides

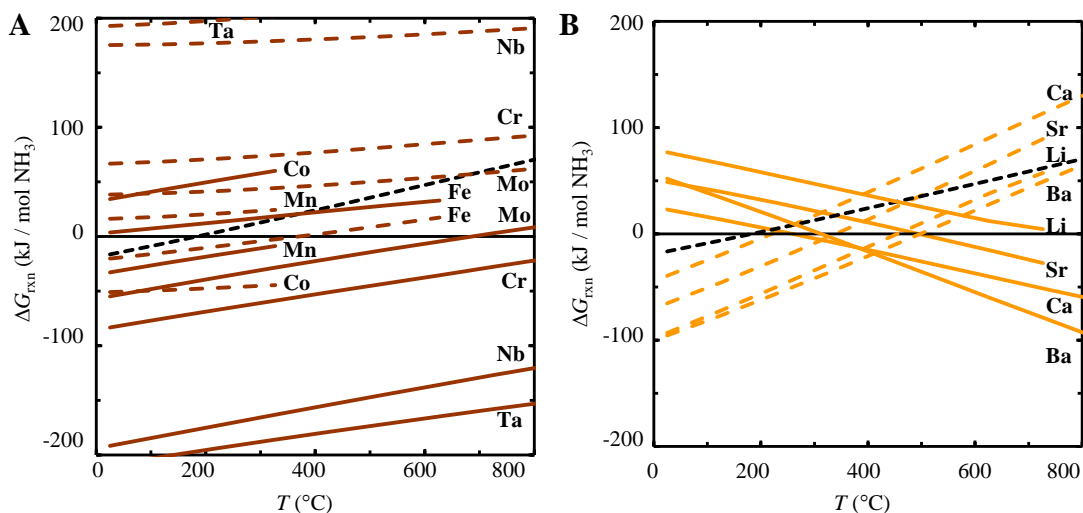

**Figure S2:** Ammonia synthesis at 1 bar via (A) reduction of a metal nitride with  $H_2$  (Eq. 1, dashed lines) and  $N_2$  reduction with the reduced metal nitrides (Eq. 2, solid lines) and (B) hydrogenation of a metal

nitride (Eq. 3, dashed line) and  $N_2$  reduction with metal hydrides (Eq. 4, solid line). The computed materials are (A)  $Co_3N/Co$ ,  $Fe_4N/Fe$ ,  $Mn_5N_2/Mn_4N$ ,  $Mo_2N/Mo$ ,  $CrN/Cr_2N$ ,  $TaN/Ta_2N$ , and  $NbN/Nb_2N$ , and (B)  $Li_3N/LiH$ ,  $Ba_3N_2/BaH_2$ ,  $Sr_3N_2/SrH_2$ , and  $Ca_3N_2/CaH_2$ , marked with their metallic constituents. The equilibrium of  $NH_3$  with  $3/2H_2$  and  $1/2N_2$ , favoring  $NH_3$  below about  $180^\circ C$ , is shown as reference at 1 bar (dotted line). While the  $N_2$  reduction with metal hydrides may form  $NH_3$  (*i.e.*, the superposition of  $\Delta G_{rxn}$  of the  $N_2$  reduction and the  $NH_3$  equilibrium with  $N_2/H_2$ ) at low temperatures, which is expected to increase the yield of the metal nitride slightly, this will not change the endergonic character of the shown reaction equilibria at the computed temperatures.

The correlation of the thermochemical equilibrium of the  $NH_3$  evolution at  $25^\circ C$  with  $N_d E_d$  was computed for the  $Co_3N/Co$ ,  $Fe_4N/Fe$ ,  $Mn_5N_2/Mn_4N$ ,  $Mo_2N/Mo$ ,  $CrN/Cr_2N$ ,  $TaN/Ta_2N$ , and  $NbN/Nb_2N$  pairs; the analogous correlation with  $N_s E_s$  was computed for the  $Li_3N/LiH$ ,  $Ba_3N_2/BaH_2$ ,  $Sr_3N_2/SrH_2$ , and  $Ca_3N_2/CaH_2$  pairs. The number of electrons and the energy of these electrons in a given ground state are taken from the electronic structure code DACAPO.<sup>3</sup> We note the trend of the reaction energetics of the alkaline earth metal nitrides with the bonding valence s-electrons in the metal ground state does not apply to Be and Mg constituents which do not form thermally stable metal hydrides at ambient pressure.<sup>4</sup>

### 3.4 $NH_3$ evolution from Fe-doped $Mn_4N$

One possibility to control the reactivity of the lattice nitrogen at the surface is to weaken the strength of the chemical bond formed between manganese and nitrogen. This may be achieved via doping the metal nitride with a metal,<sup>5,6</sup> such as iron, that forms only weak metal-nitrogen bonds. Figure S3 shows the ammonia yield from Fe-doped  $Mn_4N$ , equimolar in Fe/Mn. The sample was cycled three times; after 10 min in  $H_2$  at  $700^\circ C$ , 3.3, 2.1, and 2.0 mol%  $NH_3$  were formed in the cycles. This shows no significant improvement compared to 2.7 mol% after 10 min at  $700^\circ C$  in the absence of Fe, which is shown with Figure 6. In agreement with the relatively slow reaction kinetics of manganese nitride discussed above, Figure S3 shows that the concentration of the lattice nitrogen throughout the  $NH_3$  evolution and  $N_2$  reduction remained constant within the analytical uncertainty. We note, a full assessment of the effect of iron on the strength of the manganese-nitrogen bond requires testing of a ternary metal nitride or nanocomposite. However, the present results suggest that iron diminishes the yield of the ammonia evolution, which can be understood due to the catalytic activity of iron in establishing the chemical equilibrium in  $NH_3$ ,  $N_2$  and  $H_2$  gas mixtures.<sup>7</sup>

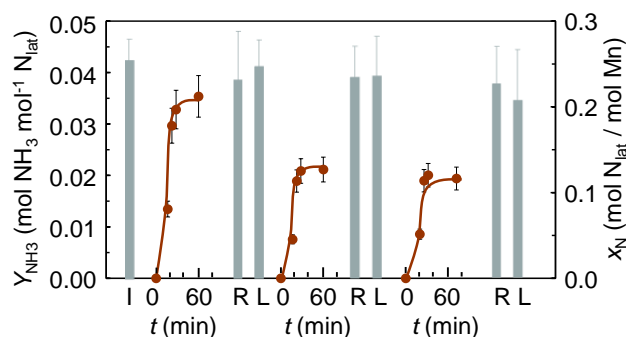

**Figure S3:** Ammonia yield (red circles, lines to guide the eye  $\pm 11.43\%$  via error propagation) from Fe-doped  $Mn_4N$  heated successively in  $H_2$  at  $700^\circ C$  and 1 bar (data points are before heating, when reaching  $700^\circ C$ , 5 or 10 min after reaching  $700^\circ C$ , after cooling). The molar ratio of the lattice nitrogen (bars,  $\pm 26.75\%$  via error propagation) was analyzed (I) initially, (R) after the reaction with  $H_2$ , and (L) after subsequent heating for 10 min in  $N_2$  at  $750^\circ C$  and 1 bar.

### 3.5 Ammonia via metal nitride hydrogenation

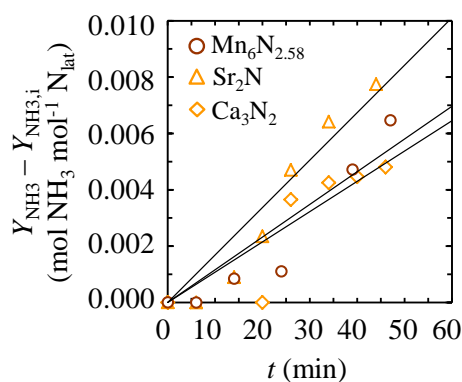

**Figure S4:** To estimate the  $\text{NH}_3$  formation rates from the reaction of metal nitrides with  $\text{H}_2$ , the difference between the  $\text{NH}_3$  yield at a given time point,  $Y_{\text{NH}_3}$ , and the initial  $\text{NH}_3$  yield,  $Y_{\text{NH}_3,i}$ , from the reaction of  $\text{Mn}_6\text{N}_{2.58}$ ,  $\text{Ca}_3\text{N}_2$ , and  $\text{Sr}_2\text{N}$  with  $\text{H}_2$  at 1 bar and 220-850°C. Solid lines are linear fits.

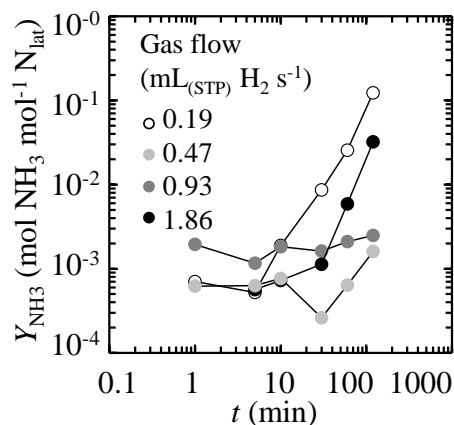

**Figure S5:**  $\text{NH}_3$  yield from the reaction of  $\text{Ca}_3\text{N}_2$  with various flow rates of  $\text{H}_2$  (given at standard temperature and pressure, STP, *i.e.*, 1 bar and 0°C) at 1 bar and 700°C vs. time. Error propagation of the  $\text{NH}_3$  yield within a 95% confidence interval (error bars omitted for clarity) yields in average about  $\pm 26.58\%$ . Solid lines are a guide only.

#### 4. References

- (1) ASE is open-source code available from the Department of Physics at the Technical University of Denmark and available at <https://wiki.fysik.dtu.dk/ase/>.
- (2) Levenspiel, O. *Chemical reaction engineering, Third Edition, Chapter 25 Fluid-particle reactions: Kinetics*; John Wiley & Sons: New York, **1999**.
- (3) [https://wiki.fysik.dtu.dk/dacapo/Pseudopotential\\_Library](https://wiki.fysik.dtu.dk/dacapo/Pseudopotential_Library).
- (4) Barin, I. *Thermochemical Data of Pure Substances*; VCH Verlagsgesellschaft mbH, 0-6940 Weinheim, Federal Republic of Germany, **1993**.
- (5) Hunter, S. M.; McKay, D.; Smith, R. J.; Hargreaves, J. S. J.; Gregory, D. H. *Chemistry of Materials* **2010**, *22*, 2898-2907.
- (6) Jacobsen, C. J. H.; Dahl, S.; Clausen, B. S.; Bahn, S.; Logadottir, A.; Nørskov, J. K. *Journal of the American Chemical Society* **2001**, *123*, 8404-8405.
- (7) Ertl, G. *Angewandte Chemie-International Edition* **2008**, *47*, 3524-3535.
